# Supplementary material for: The hidden aromaticity in borazine
Source: Royal Society of Chemistry journal article supplement (doi:10.1039/d1ra06457f), 2022-01-01
Supplement: d1ra06457f1.pdf [file d1ra06457f1.pdf]

## THE HIDDEN AROMATICITY IN BORAZINE

Rodrigo Báez-Grez<sup>a</sup> and Ricardo Pino-Rios<sup>\*b</sup>

<sup>a</sup>Computational and Theoretical Chemistry Group, Departamento de Ciencias Químicas, Facultad de Ciencias Exactas, Universidad Andres Bello, República 498, Santiago, Chile.

<sup>b</sup>Laboratorio de Química teórica, Facultad de Química y Biología. Universidad de Santiago de Chile (USACH) Av. Libertador Bernardo O'Higgins 3363, Santiago, Estación Central, Región Metropolitana, Chile. E-mail: ricardo.pino@usach.cl

### SUPPORTING INFORMATION

**Fig. S1.** Dissected Magnetically Induced Current Density maps and their  $\pi$ -contributions for cyclobutadiene at the PBE0/def2-TZVP level.

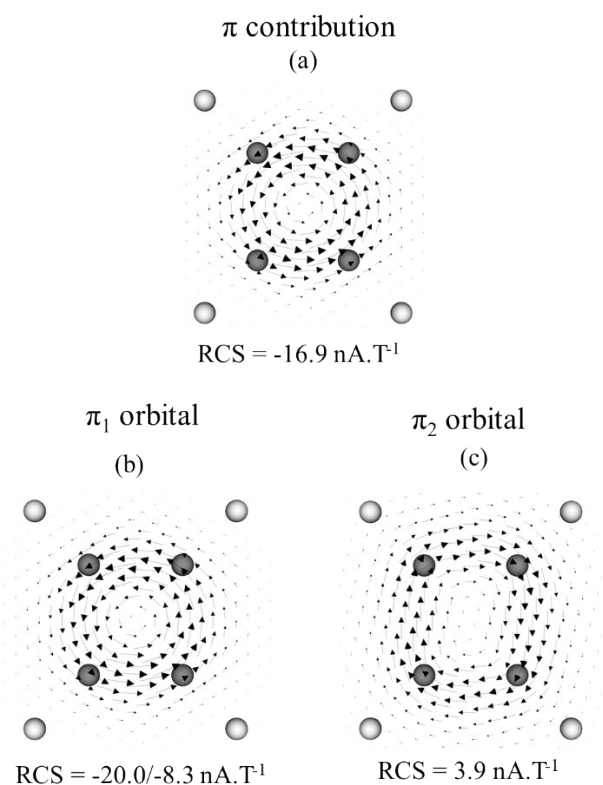

## Cartesian Coordinates

| Singlet state                                                         |              |              |                                                                       |   |              |              |              |
|-----------------------------------------------------------------------|--------------|--------------|-----------------------------------------------------------------------|---|--------------|--------------|--------------|
| Benzene                                                               |              |              | Borazine                                                              |   |              |              |              |
| 1                                                                     | -2.472353000 | 0.000008000  | -0.000012000                                                          | 1 | -2.410000000 | 0.004272000  | 0.000018000  |
| 1                                                                     | -1.235740000 | 2.140918000  | -0.000019000                                                          | 1 | -1.316858000 | 2.290636000  | 0.000061000  |
| 1                                                                     | -1.235755000 | -2.140909000 | -0.000019000                                                          | 1 | -1.324970000 | -2.285953000 | 0.000061000  |
| 1                                                                     | 1.235780000  | 2.140956000  | 0.000069000                                                           | 1 | 1.208464000  | 2.084984000  | 0.000028000  |
| 1                                                                     | 1.235765000  | -2.140964000 | 0.000069000                                                           | 1 | 1.201066000  | -2.089255000 | 0.000028000  |
| 6                                                                     | -1.388074000 | 0.000005000  | 0.000016000                                                           | 7 | -1.403964000 | 0.002489000  | -0.000007000 |
| 6                                                                     | 0.693925000  | 1.201851000  | -0.000009000                                                          | 7 | 0.704090000  | 1.214497000  | 0.000002000  |
| 6                                                                     | 0.693916000  | -1.201855000 | -0.000009000                                                          | 7 | 0.699779000  | -1.216985000 | 0.000002000  |
| 6                                                                     | -0.693863000 | 1.201771000  | 0.000000000                                                           | 5 | -0.720227000 | 1.252563000  | -0.000016000 |
| 6                                                                     | 1.387939000  | -0.000005000 | -0.000020000                                                          | 5 | 1.445026000  | -0.002561000 | 0.000003000  |
| 6                                                                     | -0.693871000 | -1.201766000 | 0.000000000                                                           | 5 | -0.724663000 | -1.250002000 | -0.000015000 |
| 1                                                                     | 2.472468000  | -0.000009000 | 0.000052000                                                           | 1 | 2.642277000  | -0.004684000 | -0.000034000 |
| Figure 3(a) C <sub>7</sub> H <sub>8</sub> <sup>-</sup>                |              |              | Figure 3(a) C <sub>7</sub> H <sub>8</sub> <sup>-</sup>                |   |              |              |              |
| 6                                                                     | -0.274788000 | 1.254897000  | 0.112236000                                                           | 6 | 0.193657000  | 1.194578000  | -0.008784000 |
| 6                                                                     | -1.024626000 | 0.013350000  | 0.028648000                                                           | 6 | 0.909114000  | 0.000138000  | -0.011092000 |
| 6                                                                     | -0.239100000 | -1.265337000 | 0.198545000                                                           | 6 | 0.193818000  | -1.194489000 | -0.008827000 |
| 6                                                                     | 1.223646000  | -1.141338000 | -0.087620000                                                          | 6 | -1.192898000 | -1.197635000 | 0.001895000  |
| 6                                                                     | 1.827054000  | 0.047781000  | -0.132390000                                                          | 6 | -1.892713000 | -0.000092000 | 0.008402000  |
| 6                                                                     | 1.065783000  | 1.272869000  | 0.040510000                                                           | 6 | -1.193134000 | 1.197510000  | 0.001935000  |
| 1                                                                     | -0.836289000 | 2.181336000  | 0.177465000                                                           | 1 | 0.732569000  | 2.136922000  | -0.017984000 |
| 1                                                                     | -0.340637000 | -1.595896000 | 1.244536000                                                           | 1 | 0.732874000  | -2.136761000 | -0.018069000 |
| 1                                                                     | 1.793979000  | -2.056595000 | -0.207176000                                                          | 1 | -1.729141000 | -2.140195000 | 0.001201000  |
| 1                                                                     | 2.895998000  | 0.116615000  | -0.301169000                                                          | 1 | -2.976680000 | -0.000196000 | 0.013746000  |
| 1                                                                     | 1.598127000  | 2.217244000  | 0.069664000                                                           | 1 | -1.729507000 | 2.139995000  | 0.001269000  |
| 6                                                                     | -2.347091000 | 0.012995000  | -0.172321000                                                          | 6 | 2.408405000  | 0.000064000  | 0.009149000  |
| 1                                                                     | -2.903202000 | 0.941766000  | -0.232526000                                                          | 1 | 2.785529000  | -0.008397000 | 1.036725000  |
| 1                                                                     | -2.908408000 | -0.908508000 | -0.279450000                                                          | 1 | 2.813498000  | -0.880172000 | -0.493659000 |
| 1                                                                     | -0.684834000 | -2.067259000 | -0.396996000                                                          | 1 | 2.813368000  | 0.888359000  | -0.479291000 |
| Figure 3(b) B <sub>4</sub> N <sub>3</sub> H <sub>8</sub> <sup>-</sup> |              |              | Figure 3(b) B <sub>4</sub> N <sub>3</sub> H <sub>8</sub> <sup>-</sup> |   |              |              |              |
| 1                                                                     | 0.946115000  | 2.311183000  | 0.004511000                                                           | 1 | 0.802259000  | 2.289758000  | -0.011679000 |
| 1                                                                     | -1.762176000 | -1.982801000 | -0.019610000                                                          | 1 | -1.670387000 | -2.086751000 | 0.001239000  |
| 1                                                                     | -3.075274000 | 0.153922000  | -0.023518000                                                          | 1 | -3.147854000 | -0.000921000 | 0.007065000  |
| 1                                                                     | 0.648282000  | -2.003779000 | 1.035281000                                                           | 1 | 0.803893000  | -2.288747000 | -0.011669000 |
| 1                                                                     | -1.537222000 | 2.175768000  | 0.005284000                                                           | 1 | -1.671834000 | 2.085921000  | 0.001251000  |
| 7                                                                     | -1.204361000 | -1.145781000 | -0.008276000                                                          | 7 | -1.191121000 | -1.203217000 | 0.002771000  |
| 7                                                                     | -1.072195000 | 1.285840000  | 0.006842000                                                           | 7 | -1.191963000 | 1.202716000  | 0.002783000  |
| 7                                                                     | 1.069828000  | 0.019638000  | 0.001959000                                                           | 7 | 0.981837000  | 0.000556000  | -0.010129000 |
| 5                                                                     | -1.863669000 | 0.066460000  | -0.008903000                                                          | 5 | -1.939433000 | -0.000478000 | 0.005141000  |
| 5                                                                     | 0.348702000  | 1.258423000  | 0.005226000                                                           | 5 | 0.259541000  | 1.213138000  | -0.006683000 |
| 5                                                                     | 0.329219000  | -1.377943000 | 0.016533000                                                           | 5 | 0.260289000  | -1.212562000 | -0.006696000 |
| 5                                                                     | 2.463139000  | 0.069245000  | -0.012629000                                                          | 5 | 2.568330000  | 0.000071000  | 0.007976000  |
| 1                                                                     | 3.044654000  | 1.132517000  | -0.016974000                                                          | 1 | 2.974570000  | -0.010457000 | 1.175278000  |
| 1                                                                     | 3.120750000  | -0.945206000 | -0.020943000                                                          | 1 | 2.987062000  | -1.001044000 | -0.572935000 |
| 1                                                                     | 0.675013000  | -2.040407000 | -0.968846000                                                          | 1 | 2.987383000  | 1.011014000  | -0.555213000 |
| Figure 3(c) B <sub>3</sub> N <sub>4</sub> H <sub>8</sub> <sup>+</sup> |              |              | Figure 3(c) B <sub>3</sub> N <sub>4</sub> H <sub>8</sub> <sup>+</sup> |   |              |              |              |
| 1                                                                     | -2.922044000 | 0.069078000  | 0.000074000                                                           | 1 | -2.948412000 | -0.000079000 | 0.008449000  |
| 1                                                                     | -1.800858000 | 2.322152000  | 0.000593000                                                           | 1 | -1.858726000 | 2.293902000  | 0.003967000  |
| 1                                                                     | -1.871127000 | -2.264211000 | 0.000091000                                                           | 1 | -1.858575000 | -2.293986000 | 0.003983000  |
| 1                                                                     | 0.684750000  | 2.157297000  | -0.000174000                                                          | 1 | 0.642504000  | 2.115033000  | -0.004923000 |
| 1                                                                     | 0.520684000  | -1.812618000 | 0.802235000                                                           | 1 | 0.642651000  | -2.114949000 | -0.004932000 |
| 7                                                                     | -1.912017000 | 0.030310000  | 0.000018000                                                           | 7 | -1.939485000 | -0.000044000 | 0.004591000  |
| 7                                                                     | 0.216589000  | 1.262509000  | -0.000278000                                                          | 7 | 0.168333000  | 1.225554000  | -0.005956000 |
| 7                                                                     | 0.227927000  | -1.247141000 | -0.000084000                                                          | 7 | 0.168411000  | -1.225506000 | -0.005962000 |
| 5                                                                     | -1.203171000 | 1.296906000  | 0.000128000                                                           | 5 | -1.281199000 | 1.255386000  | 0.001346000  |
| 5                                                                     | 1.015289000  | 0.095769000  | -0.000051000                                                          | 5 | 0.837022000  | 0.000050000  | -0.009908000 |
| 5                                                                     | -1.321607000 | -1.213001000 | 0.000063000                                                           | 5 | -1.281112000 | -1.255434000 | 0.001350000  |
| 7                                                                     | 2.396472000  | 0.017382000  | 0.000191000                                                           | 7 | 2.408683000  | 0.000023000  | 0.005015000  |
| 1                                                                     | 2.982878000  | 0.836696000  | 0.000031000                                                           | 1 | 2.766767000  | -0.001972000 | 0.963101000  |
| 1                                                                     | 2.929945000  | -0.835786000 | 0.000185000                                                           | 1 | 2.799255000  | -0.820389000 | -0.460372000 |
| 1                                                                     | 0.520421000  | -1.812396000 | -0.802664000                                                          | 1 | 2.799387000  | 0.822246000  | -0.457033000 |
| Triplet state                                                         |              |              |                                                                       |   |              |              |              |
| Benzene                                                               |              |              | Borazine                                                              |   |              |              |              |
| 1                                                                     | -2.518979000 | 0.000014000  | 0.000142000                                                           | 1 | -2.441885000 | 0.000083000  | -0.001699000 |
| 1                                                                     | -1.283610000 | 2.145989000  | -0.001079000                                                          | 1 | -1.338283000 | 2.338607000  | -0.004631000 |
| 1                                                                     | -1.283636000 | -2.145974000 | -0.001070000                                                          | 1 | -1.338443000 | -2.338523000 | -0.004610000 |
| 1                                                                     | 1.283607000  | 2.146140000  | 0.001215000                                                           | 1 | 1.244014000  | 2.078928000  | 0.003386000  |
| 1                                                                     | 1.283582000  | -2.146154000 | 0.001206000                                                           | 1 | 1.243878000  | -2.079010000 | 0.003370000  |
| 6                                                                     | -1.433949000 | 0.000007000  | 0.000302000                                                           | 7 | -1.433367000 | 0.000046000  | 0.000448000  |
| 6                                                                     | 0.755221000  | 1.202162000  | -0.000023000                                                          | 7 | 0.751044000  | 1.195375000  | 0.000603000  |
| 6                                                                     | 0.755206000  | -1.202171000 | -0.000026000                                                          | 7 | 0.750962000  | -1.195427000 | 0.000597000  |
| 6                                                                     | -0.755152000 | 1.202130000  | -0.000007000                                                          | 5 | -0.815030000 | 1.271121000  | 0.000497000  |

|                                                                       |              |              |              |                                                                       |              |              |              |
|-----------------------------------------------------------------------|--------------|--------------|--------------|-----------------------------------------------------------------------|--------------|--------------|--------------|
| 6                                                                     | 1.433811000  | -0.000008000 | -0.000300000 | 5                                                                     | 1.517964000  | -0.000044000 | -0.001818000 |
| 6                                                                     | -0.755167000 | -1.202121000 | -0.000004000 | 5                                                                     | -0.815123000 | -1.271070000 | 0.000503000  |
| 1                                                                     | 2.519220000  | -0.000014000 | -0.000062000 | 1                                                                     | 2.711189000  | -0.000089000 | -0.003267000 |
| Figure 3(a) C <sub>7</sub> H <sub>8</sub> <sup>-</sup>                |              |              |              | Figure 3(a) C <sub>7</sub> H <sub>8</sub> <sup>-</sup>                |              |              |              |
| 6                                                                     | 0.215084000  | 1.246557000  | -0.031736000 | 6                                                                     | -0.264168000 | 1.232105000  | -0.000055000 |
| 6                                                                     | 0.899453000  | 0.000160000  | -0.030767000 | 6                                                                     | -0.999265000 | 0.075710000  | 0.000037000  |
| 6                                                                     | 0.215881000  | -1.246430000 | -0.031856000 | 6                                                                     | -0.299316000 | -1.255822000 | -0.000119000 |
| 6                                                                     | -1.202065000 | -1.246744000 | 0.004544000  | 6                                                                     | 1.179460000  | -1.180998000 | 0.000022000  |
| 6                                                                     | -1.861649000 | -0.000268000 | 0.020561000  | 6                                                                     | 1.862954000  | 0.036438000  | 0.000013000  |
| 6                                                                     | -1.202851000 | 1.246410000  | 0.004458000  | 6                                                                     | 1.188727000  | 1.228037000  | 0.000025000  |
| 1                                                                     | 0.790687000  | 2.162288000  | -0.038864000 | 1                                                                     | -0.784899000 | 2.184085000  | -0.000517000 |
| 1                                                                     | 0.791807000  | -2.161955000 | -0.039091000 | 1                                                                     | -0.654252000 | -1.841690000 | 0.865308000  |
| 1                                                                     | -1.773797000 | -2.163198000 | 0.025753000  | 1                                                                     | 1.735566000  | -2.111523000 | 0.000412000  |
| 1                                                                     | -2.948699000 | -0.000623000 | 0.047711000  | 1                                                                     | 2.947832000  | 0.030818000  | 0.000035000  |
| 1                                                                     | -1.774914000 | 2.162650000  | 0.025530000  | 1                                                                     | 1.722403000  | 2.169823000  | 0.000259000  |
| 6                                                                     | 2.375888000  | 0.000491000  | 0.024772000  | 6                                                                     | -2.400731000 | 0.074484000  | 0.000095000  |
| 1                                                                     | 2.678601000  | -0.006109000 | 1.081613000  | 1                                                                     | -2.958648000 | 1.002814000  | 0.000208000  |
| 1                                                                     | 2.798911000  | -0.893916000 | -0.436251000 | 1                                                                     | -2.959872000 | -0.852909000 | 0.000196000  |
| 1                                                                     | 2.798965000  | 0.899805000  | -0.426260000 | 1                                                                     | -0.654102000 | -1.841146000 | -0.866010000 |
| Figure 3(b) B <sub>4</sub> N <sub>3</sub> H <sub>8</sub> <sup>-</sup> |              |              |              | Figure 3(b) B <sub>4</sub> N <sub>3</sub> H <sub>8</sub> <sup>-</sup> |              |              |              |
| 1                                                                     | 0.716417000  | 2.389089000  | -0.001276000 | 1                                                                     | 0.751703000  | 2.329311000  | -0.017437000 |
| 1                                                                     | -1.492712000 | -2.127534000 | -0.000079000 | 1                                                                     | -1.558595000 | -2.136005000 | 0.022660000  |
| 1                                                                     | -3.093567000 | -0.142151000 | -0.002669000 | 1                                                                     | -3.131308000 | -0.095064000 | 0.041892000  |
| 1                                                                     | 0.942580000  | -1.985193000 | 0.792737000  | 1                                                                     | 0.911893000  | -2.154316000 | -0.415891000 |
| 1                                                                     | -1.749958000 | 2.034498000  | -0.000553000 | 1                                                                     | -1.730313000 | 2.037634000  | -0.016325000 |
| 7                                                                     | -1.064925000 | -1.217993000 | 0.000909000  | 7                                                                     | -1.124288000 | -1.231834000 | 0.027994000  |
| 7                                                                     | -1.216738000 | 1.182999000  | 0.000851000  | 7                                                                     | -1.222963000 | 1.171419000  | -0.018030000 |
| 7                                                                     | 1.028086000  | 0.119619000  | 0.000357000  | 7                                                                     | 0.997710000  | 0.058908000  | 0.005076000  |
| 5                                                                     | -1.887296000 | -0.064743000 | -0.000867000 | 5                                                                     | -1.920934000 | -0.061016000 | 0.002830000  |
| 5                                                                     | 0.231322000  | 1.284499000  | -0.000406000 | 5                                                                     | 0.227018000  | 1.240882000  | -0.018952000 |
| 5                                                                     | 0.384325000  | -1.136579000 | -0.000099000 | 5                                                                     | 0.326481000  | -1.182674000 | 0.027195000  |
| 5                                                                     | 2.531539000  | 0.116929000  | 0.000318000  | 5                                                                     | 2.427447000  | 0.118603000  | 0.011349000  |
| 1                                                                     | 3.116702000  | 1.172890000  | -0.000368000 | 1                                                                     | 2.879557000  | -0.844899000 | 0.765026000  |
| 1                                                                     | 3.095489000  | -0.950425000 | -0.002128000 | 1                                                                     | 2.973863000  | -0.851066000 | -0.611331000 |
| 1                                                                     | 0.940642000  | -1.984075000 | -0.795211000 | 1                                                                     | 3.049926000  | 1.145974000  | 0.014015000  |
| Figure 3(c) B <sub>3</sub> N <sub>4</sub> H <sub>8</sub> <sup>+</sup> |              |              |              | Figure 3(c) B <sub>3</sub> N <sub>4</sub> H <sub>8</sub> <sup>+</sup> |              |              |              |
| 1                                                                     | -2.875486000 | -0.156430000 | 0.169917000  | 1                                                                     | -2.921827000 | -0.000162000 | -0.257387000 |
| 1                                                                     | -1.976798000 | 2.166836000  | 0.030182000  | 1                                                                     | -1.877171000 | 2.230891000  | 0.327838000  |
| 1                                                                     | -1.478129000 | -1.537653000 | -1.153984000 | 1                                                                     | -1.876911000 | -2.231111000 | 0.327467000  |
| 1                                                                     | 0.602635000  | 2.162321000  | -0.008832000 | 1                                                                     | 0.636880000  | 2.118078000  | -0.041403000 |
| 1                                                                     | 0.695017000  | -1.657872000 | 0.892471000  | 1                                                                     | 0.637159000  | -2.117915000 | -0.039918000 |
| 7                                                                     | -1.870255000 | -0.097048000 | 0.045220000  | 7                                                                     | -1.936417000 | -0.000083000 | 0.010644000  |
| 7                                                                     | 0.153984000  | 1.259807000  | -0.028193000 | 7                                                                     | 0.170887000  | 1.225581000  | -0.035358000 |
| 7                                                                     | 0.311750000  | -1.184194000 | 0.064320000  | 7                                                                     | 0.171039000  | -1.225479000 | -0.035517000 |
| 5                                                                     | -1.294476000 | 1.196989000  | -0.011680000 | 5                                                                     | -1.278317000 | 1.255368000  | -0.003620000 |
| 5                                                                     | 0.900323000  | 0.080470000  | 0.008763000  | 5                                                                     | 0.839451000  | 0.000099000  | -0.050657000 |
| 5                                                                     | -1.132772000 | -1.307144000 | 0.081098000  | 5                                                                     | -1.278154000 | -1.255452000 | -0.003773000 |
| 7                                                                     | 2.298143000  | 0.112956000  | -0.018372000 | 7                                                                     | 2.401942000  | 0.000022000  | 0.031555000  |
| 1                                                                     | 2.818785000  | 0.971301000  | -0.096628000 | 1                                                                     | 2.714429000  | -0.000374000 | 1.005814000  |
| 1                                                                     | 2.904659000  | -0.689086000 | 0.035932000  | 1                                                                     | 2.810013000  | -0.822857000 | -0.416055000 |
| 1                                                                     | 0.688594000  | -1.751637000 | -0.700791000 | 1                                                                     | 2.810365000  | 0.823087000  | -0.415384000 |
